# Supplementary material for: Cloud vertical distribution from combined surface and space radar/lidar observations at two Arctic atmospheric observations
Source: Copernicus journal article supplement (doi:10.5194/acp-2016-1132), 2017-01-12
Supplement: Supplementary file [file acp-2016-1132-AC1-supplement.pdf]

The response to the reviewers' comments is in italic.

Anonymous Referee #1 Received and published: 31 January 2017

The manuscript uses ground- and satellite-based retrievals of cloud fraction, cloud liquid and ice water content and cloud phase profiles from lidar and radar to compare their performance at two Arctic sites: Barrow and Eureka. They propose to merge ground and satellite retrievals of cloud fraction to compensate for their inherent limitations: issues for CloudSat and CALIPSO to detect low-level clouds versus issues for surface based measurements to detect high clouds. I do recommend major revisions as there are some issues with the presentation of the results and the actual content of the conclusions.

*We appreciate the reviewer's valuable comments. The manuscript becomes better with revisions in response to reviewer's comments and suggestions.*

1. The method section needs some extensive work, because the explanations are currently confusing and insufficient. I have detailed the problems in the specific comments below. Are monthly means calculated and used throughout? This is never explicitly said.

*Changes have been made in the method section in the revised manuscript in response to reviewer's suggestions. Details can be found in the response to reviewer's specific comments below. Monthly means are calculated and used throughout, and this is specified in the revised manuscript.*

2. The detectability issue with CloudSat and CALIPSO for low level clouds is not new, there are already a number of papers that discuss this, e.g. Kay and Gettelman 2009, or Huang et al. (JCLI, 2012, doi: 10.1175/JCLI-D-11-00131.1). The real novelty of this paper is 1) to give an estimate/magnitude to this deficiency and 2) inspect the consequences when looking at the annual cycle of cloud cover in the Arctic. This should be made more prominent.

*The references the reviewers suggested have been added in the revised manuscript with correspondent discussion. The reviewer also summarized the novelty of our work well, and we highly appreciated that and have included that in the revised manuscript.*

3. The authors have decided to separate the results from Barrow from Eureka. Why is this? Are the two sites giving different results other than differing climatologies?

*We actually spent quite some time figuring out the best way to present the results, either separating by different physical parameters, e.g. cloud amount, cloud phase, and cloud water content, or by different locations, e.g. Barrow and Eureka. We then decided to go with the latter for clearer presentation. The climatologies at these two sites are not the same, so we do not think the content are redundant.*

4. Although a blended product is a good idea, because of the good performance overall of the surface-based observations (even if less high clouds are detected, the differences with the satellite based observations are small, possibly because of the location and type of clouds). I wonder if such a product is that needed for these two locations. It might be of more use if done for the tropics.

*We totally agree with the reviewer that such a blended product might be more useful in the tropics. We would like to argue that such products may be as valuable in the polar regions as*

*they are in the tropics because of the ubiquitous low-level clouds in the polar regions, and lack of detection capability from CloudSat and CALIPSO. Such discussions have been added in the revised manuscript.*

Specific comments:

1. The title is awkward: shouldn't "observations" be "observatories"? or add "sites" at the end.

*In the title, "observations" was changed to "observatories".*

2. Line 28, page 2: Here, and elsewhere, the authors refer to CloudSat&CALIPSO as "space-based radar-lidar" which makes it quite general when one could imagine that other (future) radars and lidars might have different sensitivities and consequently issues/ strengths. If for example the characteristics of the Earthcare mission instruments will be such that they will experience the same problems, then this should be said. Otherwise it would be better in the introduction to say that when referring to "space-based radar-lidar" the authors mean CloudSat and CALIPSO.

*Responding to reviewer's comment, the following text has been added in the revised manuscript. "Space-based radar and lidar in this paper refer to existing instruments, i.e. Cloud Profiling Radar (CPR) onboard the CloudSat and the Cloud-Aerosol Lidar with Orthogonal Polarization (CALIOP) onboard the Cloud-Aerosol lidar and Infrared Pathfinder Satellite Observation (CALIPSO). However, the conclusions will likely be valid for the space-based radar and lidar instruments in the foreseeable future, i.e. the ATmospheric backscatter LIDar (ATLID), and the CPR onboard the EarthCARE mission (Heliere et al. 2007)."*

Section 2:

3. What is the temporal resolution of the profiles, surface and satellite based, when they are compared? Monthly means? Does it mean that the surface profiles are accumulated over a month and then cloud fraction calculated using a cloud mask? Please explain.

*The temporal resolution in the comparison is monthly. All surface profiles in a month are accumulated for calculation of monthly means. This has been added in the revised manuscript.*

4. Throughout the manuscript, please specify whether the lowest levels are identified about the surface or above mean sea level (which presumably is rather close at the two sites? This is not specified).

*The lowest levels are identified above the mean sea level. This has been added in the revised manuscript, "Monthly means are calculated for both surface observations and for the space-based sensors. All heights are above the mean sea level. All surface profiles in a month are accumulated for calculation of monthly means.", and "The vertical resolution of the calculated monthly means is interpolated to 100 m to be consistent with those from surface observations." In the last paragraph of section 2.*

5. Page 3, line 17: when introducing VFM, please specify which resolution, vertical or horizontal? Depending on which the 1/3, 1 and 5 km refer to, then specify the other resolution. This might help understand the method described on page 4 (see point 10 below)

*The following text has been added in the revised manuscript, "The Vertical Feature Mask (VFM) from CALIPSO's CALIOP provides cloud vertical distribution in up to 10 vertical layers at 5 km*

and 1 km horizontal resolutions, and up to 5 vertical layers at 1/3 km horizontal resolution (Vaughan et al. 2009). The vertical resolution is 30 m below 8.2 km, and 60 m between 8.2 and 20.2 km. A Selective Iterated Boundary Location (SIBYL) scheme is applied to detect all features within a given scene. Strongly scatter features, e.g. stratus clouds, can be identified in a single laser pulse, with the 1/3 km horizontal resolution, and these features are then removed in order to detect any surrounding aerosol layers. Weakly scattering features, e.g. thin cirrus clouds, are detected with the average of several laser pulses, e.g. 5 km horizontal resolution, for higher signal-to-noise ratio (Vaughan et al. 2005). Compared to the 1 km resolution data, the 5 km resolution product can identify weaker cloud features using an iterative multi-resolution averaging scheme (Vaughan et al. 2009). Combination of the cloud layer products at 5 km and 1/3 km provides a complete vertical distribution of clouds from CALIPSO (Vaughan et al. 2009, Vaughan et al. 2005).”.

6. When using GEOPROF, the authors choose the CPR\_cloud\_mask variable to be above 20 for a range bin to be cloudy. What is the convention in GEOPROF-LIDAR? How does this choice affect the results?

*The threshold in the GEOPROF-LIDAR is also 20. In the revised manuscript, we added, “This threshold is the same as that used in the 2B-GEOPROF-LIDAR (Mace et al. 2009, Mace et al. 2009). A false positive detection of 5% is estimated with this threshold in the 2B-GEOPROF-LIDAR (Mace et al. 2009)” The impact of the choice on the results is beyond the scope of this study.*

7. Line 20, page 4: here the authors specify that the satellite based profiles are selected if found within 50 km from the sites. Given the narrow swath and polar orbit, how many orbits per month actually fulfill this condition of at least one profile within 50 km? Do “6000 total sample numbers” and “1500 total sample numbers” refer to the total number of profiles?

*The text in the revised manuscript has been changed as “The monthly mean sample number of the satellite sensors is a function of latitude in the Arctic, with the fewest at 60° N, gradually increasing to a maximum around 80° N (Liu 2015). Both factors are reflected in the large number of samples at Eureka, with over 6000 total samples per month from June 2006 to December 2010 at Eureka, and around 1500 total samples at Barrow per month from middle February 2008 to December 2010.”.*

8. Page 4, lines 21-23: this sentence is confusing, maybe a simple schematic would help visualize what you mean? What is the original vertical resolution of each product?

*The vertical resolution is 30 m below 8.2 km, and 60 m between 8.2 and 20.2 km. The vertical resolution of 2B-GEOPROF and 2B-GEOPROF-lidar are at 240 m. We added this information in the revised manuscript.*

*A schematic would be great. But we did not figure out a way to make a simple schematic. So, we re-wrote the description to calculate the mean cloud vertical distribution.*

9. Lines 23-25 page 4: this sentence does not make any sense, what is a “cloud case number”? again maybe a schematic would help. Then at the end of the sentence “in a selected time period” refers to a month?

*A schematic would be great. But we did not figure out a way to make a simple schematic. So, we re-wrote the description to calculate the mean cloud vertical distribution as the following in the revised manuscript “Vertical profiles of all these products within 50 km of the two Arctic atmospheric observation sites, Barrow and Eureka, are extracted and archived. The cloud fraction vertical distribution at a resolution of 30 m is calculated as follows. The mean cloud fraction at each vertical level is calculated as the ratio of number of profiles with cloud detected at this vertical level to the total profile numbers. The cloud vertical distribution from CALIPSO at 1/3 km and 5 km are calculated first, then combined as the mean of the cloud fractions from CALIPSO 1/3 km and 5 km at each vertical level. This combined product is referred as CALIPSO 5 km, provides a complete vertical distribution of clouds from CALIPSO, and is shown in section 3. To compare, the vertical profiles of cloud fraction from CALIPSO at 1/3 km and 1 km are also combined, and shown in section 3. The combined product is referred as CALIPSO 1 km. For cloud microphysical property vertical distribution, the mean cloud phase frequency at each vertical level is calculated as the ratio of numbers of profiles with each phase to the total profile numbers. Mean cloud water content for ice (liquid) phase at each vertical level is calculated as the mean values of water content from all available ice (liquid) cloud retrievals at that level. For deriving these statistics, ice in any type of cloud (ice and mixed phase) is included, while liquid in any type of cloud (liquid and mixed phase) is included. After this step, the vertical resolution of all products is 30 m. Total cloud (ice cloud, liquid cloud, mixed phase cloud) amounts are also calculated, as the ratio of number of profiles with cloud (ice cloud, liquid cloud, mixed phase cloud) detected in any layer to the total number of profiles”.*

10. Page 4, Lines 25 onward on how the CALIPSO profiles are dealt with: again a schematic might help, as well as a clear explanation of what the horizontal and vertical resolution of these profiles are, and what it means to combine the 1/3 and 1 or 5 km products. Finally, what is the final vertical resolution of all of the products (CloudSat alone, CALIPSO alone, combined and surface)? Also why use both the 1/3 and 1km combination and the 1/3 and 5 km combination?

*Please see response to comment #4 and #9. As stated in the manuscript, it would be meaningful to see how combined 1/3 km and 1 km compares to combined 1/3 km and 5 km. The comparison of combined 1/3 km and 5 km shows more complete description, as we expected.*

*As in the response to comment #9, the vertical resolution is 30 m. We then interpolated to 100 m to be consistent with and compared to those from surface observations. These have been added in the revised manuscript.*

11. Page 5, last paragraph of section 2: are the surface products only selected when coincident with an A-train orbit? And, most importantly, are the profiles to be used in section 3 monthly means/accumulations??

*All surface profiles in a month are included in the monthly mean calculation. This is specified in the revised manuscript. “Monthly means are calculated for both surface observations and for the space-based sensors. All heights are above the mean sea level. All surface profiles in a month are accumulated for calculation of monthly means.”*

12. Figure 1, 2, 7, 9, 10 and 11: the color bar covers 0-50% but from the text cloud fractions exceed this value at low levels it seems. Why not use the full range of available values?

*Figures 1,2,7,9,10 have been updated in the revised manuscript. The color range extends to 0-80% for Barrow, and 0-60% for Eureka. We also tried extending to 0-100% for both stations, and the details in the figures were not shown as well.*

13. How is the “monthly mean total cloud amount” calculated for each instrument? (e.g. line 28, page 6)

*The following text has been added in the revised manuscript “Total cloud (ice cloud, liquid cloud, mixed phase cloud) amounts are also calculated, as the ratio of number of profiles with cloud (ice cloud, liquid cloud, mixed phase cloud) detected in any layer to the total number of profiles”.*

14. Figures 4, 5, 6 need to be redone with either thicker lines or (better) in color, to help distinguish between the different lines. It is really hard to read these as they are.

*Figure 4 and 5 have been updated with lines in color in the revised manuscript. We think the lines in Figure 6 are clear, so we did not update Figure 6.*

15. Page 7, sentence on lines 3-4: this is awkward, since you’ve already explained that the surface products were described in Shupe (2007, 2011), why not skip this first sentence and add reference to these two studies in the next sentence.

*Revised as the reviewer suggested.*

16. Page 9, line 10: “Major differences” between what? Barrow and Eureka or surface and satellite?

*This paragraph has been revised as the following, “Vertical distributions of ice cloud, liquid cloud, and mixed phase cloud at Eureka from space-based observations show similar patterns above 1 km as those from surface observations (Figure 9). The major differences between surface and space-based observations in the cloud vertical distributions at Eureka (Figure 8d, 8e, 8f, and Figure 9) are similar to those at Barrow (Figure 7, Figure 8a, 8b, and 8c). Major differences between surface and space-based observations include: much less ice and mixed phase cloud in the lowest 1 km from space-based observations; greater liquid cloud, and mixed phase cloud above 2 km in the vertical distributions and annual mean of vertical distributions from space-based observations (Figure not shown); comparable monthly mean total cloud amount, higher ice cloud monthly means, lower liquid cloud monthly means, and higher mixed phase cloud monthly means from surface observations relative to space-based observations. In additions, both satellite and surface observations reveal a key difference to the annual cycles of clouds at Eureka versus Barrow. While both sites have a similar annual cycle of ice cloud occurrence with a relative decrease in summer (Figure 8a, and 8d), there are less frequent liquid-containing clouds at Eureka with the annual maximum of these generally shifted to the autumn. These relative annual cycles explain the key differences in total cloud occurrence fraction over the annual cycle and are explained by generally colder and drier conditions in Eureka relative to Barrow (e.g., Shupe 2011).”.*

17. Section 3.2: more information is needed: what is the temporal resolution of the combined product? If monthly means, then this is a combination of the monthly means from surface and satellite? Or are these constructed for coincident observations only? Then how are the two products reconciled in term of surface time average vs satellite spatial average? Line 27: “a complete picture of the “ monthly “cloud fraction vertical distribution”?”

*The blended product is in monthly means. Line 27 has been revised as the reviewer suggested.*

18. Section 3.3: what is the take-home message for this section?

*The following text has been added in the revised manuscript, “These comparisons indicate that liquid water content monthly means from space-based and surface observations show similar annual evolution with noticeable magnitude differences. The ice water content monthly means from space and surface observations share little similarities in annual evolution or magnitude. Further investigation of these differences is warranted in order to combine these products for a complete vertical distribution of cloud water content”.*

19. Conclusions: the first “primary conclusion” is the direct consequence of the known limitations in the CloudSat (surface clutter/low sensitivity) and the CALIPSO (attenuation) instruments. References to other studies should be given. For the second “primary conclusion”, I would be inclined to conclude that surface observations perform well, regardless of cloud altitude. For the third conclusion, I would encourage the authors to discuss a bit more the implications for the annual cycle of the satellite based deficiencies. Finally, although I agree that the blended product is more accurate than surface only observations, I think that the real advantage is if one is to calculate heating rates and/or TOA/surface fluxes, this is where this product might make a difference. This should be discussed.

*All the suggestions are well received, and correspondent discussions have been added in the revised manuscript as suggested by the reviewer. In each of the primary conclusions an additional sentence or more has been added to better capture implications and context.*

20. Finally, two papers come to mind to address the very last sentence of the paper, where combined satellite products were used to evaluate cloud impacts in the Arctic in Kay et al (2008) and Kay and Gettelman (2009). The authors might want to mention these results.

*We agree. Kay et al. (2008) and Kay and Gettelman (2009) used combined satellite products. The last sentence of the manuscript suggests that we need combine surface-based and satellite products, in addition to combined satellite products. However, we appreciate the suggestions, and both references have been included in the revised manuscript.*

Typos

1. Abstract, line 24: remove “annual cycle” after “vertical distribution”
2. Line 24, page 3: “negligible surface above 0.96 km” does not make sense, is “clutter” missing?
3. Line 26, page 6: please add “to” before “penetrate” and “thick” after “optically”
4. Line 34, page 6: replace “the” before “CloudSat” with “that”.
5. Line 13, page 7: add “with” before “2B-CLDCLASS-lidar”
6. Page 8, line 21: remove “This” after “Whether”

7. Page 8. Line 23: “the” instead of “he” before “whole Arctic”

Kay, J. E., and A. Gettelman (2009), Cloud influence on and response to seasonal Arctic sea ice loss, *J. Geophys. Res.*, 114, D18204, doi:10.1029/2009JD011773

Kay, J. E., T. L’Ecuyer, A. Gettelman, G. Stephens, and C. O’Dell (2008), The contribution of cloud and radiation anomalies to the 2007 Arctic sea ice extent minimum, *Geophys. Res. Lett.*, 35, L08503, doi:10.1029/2008GL033451

*All the typos have been corrected. Both references have been added in the revised manuscript.*
